# Supplementary material for: Effect-Directed Profiling of Akebia quinata and Clitoria ternatea via High-Performance Thin-Layer Chromatography, Planar Assays and High-Resolution Mass Spectrometry
Source: MDPI journal article supplement (doi:10.3390/molecules28072893), 2023-03-23
Supplement: s1 [file s1]

## **Supplementary Material**

### **Effect-Directed Profiling of *Akebia quinata* and *Clitoria ternatea* via High-Performance Thin-Layer Chromatography, Planar Assays and High-Resolution Mass Spectrometry**

**Hanna Nikolaichuk <sup>1-3</sup>, Irena M. Choma <sup>2</sup>, Gertrud E. Morlock <sup>1,\*</sup>**

<sup>1</sup> Chair of Food Science, Institute of Nutritional Science, Justus Liebig University Giessen, Heinrich-Buff-Ring 26-32, 35392 Giessen, Germany

<sup>2</sup> Department of Chromatography, Faculty of Chemistry, Maria Curie-Sklodowska University sq.3, 20031 Lublin, Poland

<sup>3</sup> Department of Bioanalytics, Faculty of Biomedicine, Medical University of Lublin, Jaczewskiego st. 8b, 20090, Lublin, Poland

\*Correspondence: [gertrud.morlock@uni-giessen.de](mailto:gertrud.morlock@uni-giessen.de)

**Table S1** List of the investigated *Akebia quinata* and *Clitoria ternatea* samples

| ID                                 | Plant part | Product name                          | Provider                                | Country of origin |
|------------------------------------|------------|---------------------------------------|-----------------------------------------|-------------------|
| <b><i>Akebia quinata</i> D.</b>    |            |                                       |                                         |                   |
| A1                                 | Leaf       | -                                     | Botanical garden, Giessen, Germany      | Germany           |
| A2                                 | Leaf       | -                                     | Palmengarten, Frankfurt, Germany        | Germany           |
| A3                                 | Leaf       | -                                     | Jagiellonian University, Cracow, Poland | Poland            |
| A4                                 | Fruit      | -                                     | Jagiellonian University, Cracow, Poland | Poland            |
| <b><i>Clitoria ternatea</i> L.</b> |            |                                       |                                         |                   |
| C1                                 | Flower     | Butterfly pea tea                     | Redplum Private, Faridabad, India       | India             |
| C2                                 | Flower     | Butterfly pea flower (Klitorienblüte) | Herbathek, Berlin, Germany              | Sri Lanka         |
| C3                                 | Flower     | Niebieska <i>Clitoria ternatea</i>    | Proherbis, Dębowiec, Poland             | China             |
| C4                                 | Flower     | Kwiat klitorii ternateńskiej          | Dary Natury, Grodzisk, Poland           | Poland            |

**Table S2** Mobile phase optimization for *Akebia quinata* (4 µL/band) and *Clitoria ternatea* (5 µL/band) extracts on HPTLC plate silica gel 60 F<sub>254</sub> separated with the respective mobile phase system

| <b><i>Akebia quinata</i></b> |                                          |              |                                                                                                     |
|------------------------------|------------------------------------------|--------------|-----------------------------------------------------------------------------------------------------|
| MP                           | Solvent composition                      | Ratio (V/V)  | Chromatograms at UV 254 nm, FLD 366 nm and bioluminescence after <i>Alivibrio fischeri</i> bioassay |
| 1                            | Ethyl acetate-methanol-water             | 77:13:10     | 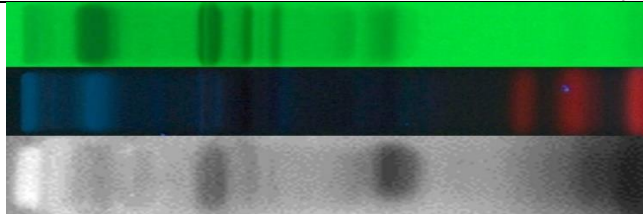                  |
| 2                            | Ethyl acetate-methanol-water-acetic acid | 77:13:10:1   |                   |
| 3                            | Ethyl acetate-methanol-water-acetic acid | 77:13:10:2   |                  |
| 4                            | Ethyl acetate-acetonitrile-water         | 7:2:1        |                 |
| 5                            | Ethyl acetate-acetonitrile-water         | 5:4:1        |                 |
| 6                            | Ethyl acetate-methanol-water-acetic acid | 77:13:10:1.5 |                 |
| 7                            | Ethyl acetate-methanol-water-acetic acid | 70:15:10:2   |                 |

|    |                                                                                    |            |                                                                                      |
|----|------------------------------------------------------------------------------------|------------|--------------------------------------------------------------------------------------|
| 8  | Ethyl acetate-acetonitrile-water-acetic acid                                       | 50:40:10:1 | 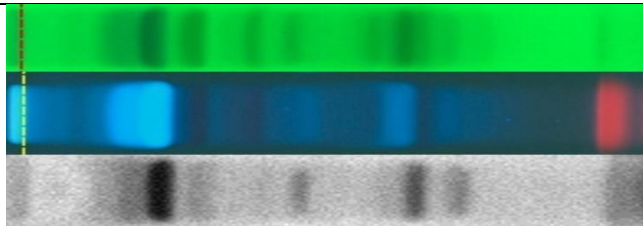   |
| 9  | Ethyl acetate-methanol-water-acetic acid                                           | 70:15:10:1 |    |
| 10 | Ethyl acetate-methanol-water-acetic acid                                           | 50:40:10:1 |    |
| 11 | Ethyl acetate-methanol-water-acetic acid                                           | 60:30:10:1 |   |
| 12 | Ethyl acetate-methanol-water-acetic acid                                           | 70:20:10:1 |  |
| 13 | Ethyl acetate-acetonitrile-water-acetic acid                                       | 40:50:10:1 |  |
| 14 | Focusing (methanol), 3 cm<br>Ethyl acetate-water                                   | 10:1       |  |
| 15 | Focusing (methanol, 2 x acetone), 2 cm<br>Ethyl acetate-methanol-water-acetic acid | 70:15:15:1 |  |

|    |                                                                             |               |                                                                                     |
|----|-----------------------------------------------------------------------------|---------------|-------------------------------------------------------------------------------------|
| 16 | Ethyl acetate-methanol-water-acetic acid                                    | 70:15:15:1    | 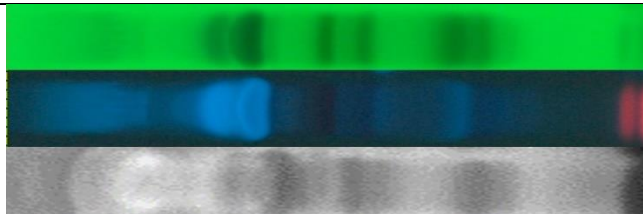  |
| 17 | Focusing (2 x acetone),<br>2 cm<br>Ethyl acetate-methanol-water-acetic acid | 7:1.5:1.5:0.1 |   |
| 16 | Ethyl acetate-methanol-water- acetic acid                                   | 7:1.5:1.5:0.1 |  |

### ***Clitoria ternatea***

| MP | Solvent composition                      | Ratio (V/V) | Chromatograms at UV 254 nm, FLD 366 nm and bioluminescence after <i>Aliivibrio fischeri</i> bioassay |
|----|------------------------------------------|-------------|------------------------------------------------------------------------------------------------------|
| 1  | Ethyl acetate-methanol-water             | 77:13:10    | 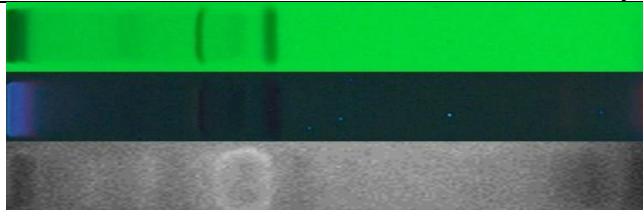                 |
| 2  | Ethyl acetate-methanol-water-acetic acid | 77:13:10:1  |                  |
| 3  | Ethyl acetate-methanol-water-acetic acid | 77:13:10:2  |                  |

|    |                                              |              |                                                                                      |
|----|----------------------------------------------|--------------|--------------------------------------------------------------------------------------|
| 4  | Ethyl acetate-acetonitrile-water             | 7:2:1        |    |
| 5  | Ethyl acetate-acetonitrile-water             | 5:4:1        |    |
| 6  | Ethyl acetate-methanol-water-acetic acid     | 77:13:10:1.5 |    |
| 7  | Ethyl acetate-methanol-water-acetic acid     | 70:15:10:2   |   |
| 8  | Ethyl acetate-acetonitrile-water-acetic acid | 50:40:10:1   |  |
| 9  | Ethyl acetate-methanol-water-acetic acid     | 70:15:10:1   |  |
| 10 | Ethyl acetate-methanol-water-acetic acid     | 50:40:10:1   |  |
| 11 | Ethyl acetate-methanol-water-acetic acid     | 60:30:10:1   |  |



|    |                                                                                    |               |                                                                                      |
|----|------------------------------------------------------------------------------------|---------------|--------------------------------------------------------------------------------------|
| 12 | Ethyl acetate-methanol-water-acetic acid                                           | 70:20:10:1    | 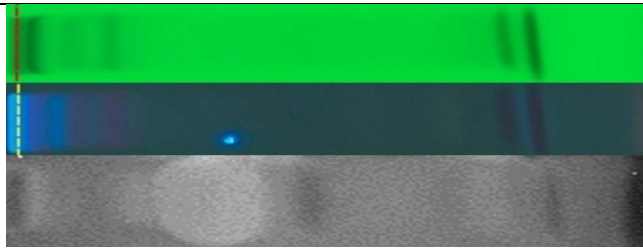   |
| 13 | Ethyl acetate-acetonitrile-water-acetic acid                                       | 40:50:10:1    |    |
| 14 | Focusing (methanol), 3 cm<br>Ethyl acetate-water                                   | 10:1          |    |
| 15 | Focusing (methanol, 2 x acetone), 2 cm<br>Ethyl acetate-methanol-water-acetic acid | 70:15:15:1    |   |
| 16 | Ethyl acetate-methanol-water-acetic acid                                           | 70:15:15:1    |  |
| 17 | Focusing (2 x acetone), 2 cm<br>Ethyl acetate-methanol-water-acetic acid           | 7:1.5:1.5:0.1 |  |
| 16 | Ethyl acetate-methanol-water- acetic acid<br><br>3, 3,5 and 4 µL/band              | 7:1.5:1.5:0.1 |  |

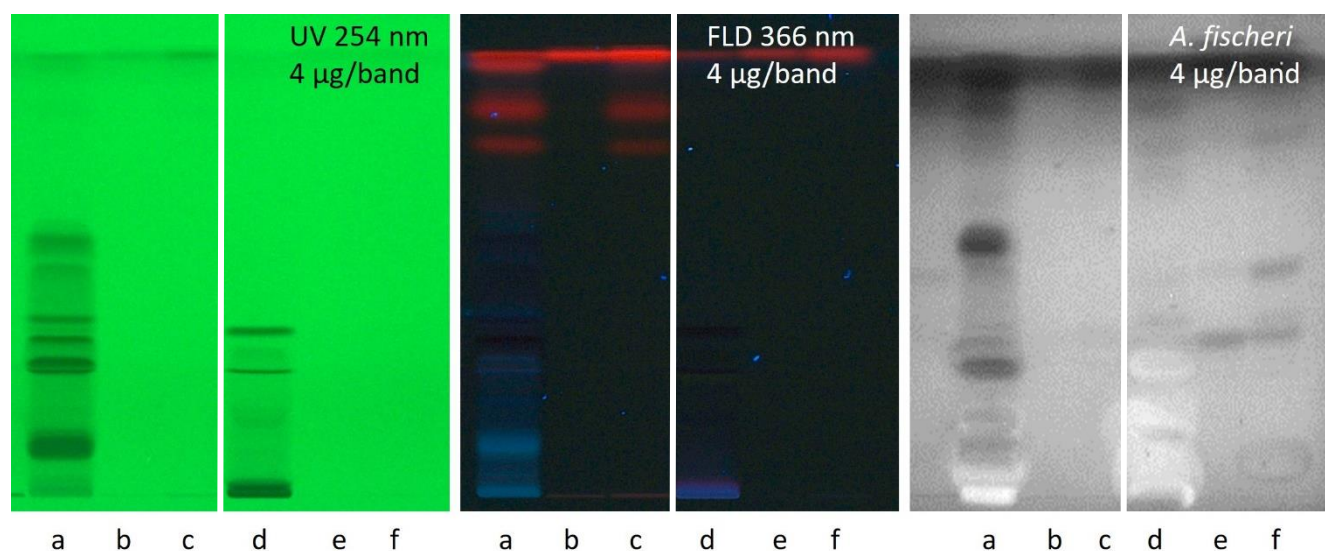

**Figure S1.** Selection of extractant for *Akebia quinata* (a–c) and *Clitoria ternatea* (d–f): HPTLC chromatograms at UV 254 nm and FLD 366 nm as well as *A. fischeri* bioautogram (bioluminescence depicted as greyscale image) showing extraction either with (a/d) methanol–water 4:1 or (b/e) *n*-hexane or (c/f) ethyl acetate, all separated on the HPTLC plate silica gel 60 F<sub>254</sub> with ethyl acetate–methanol–water 7.7:1.3:1, V/V/V.



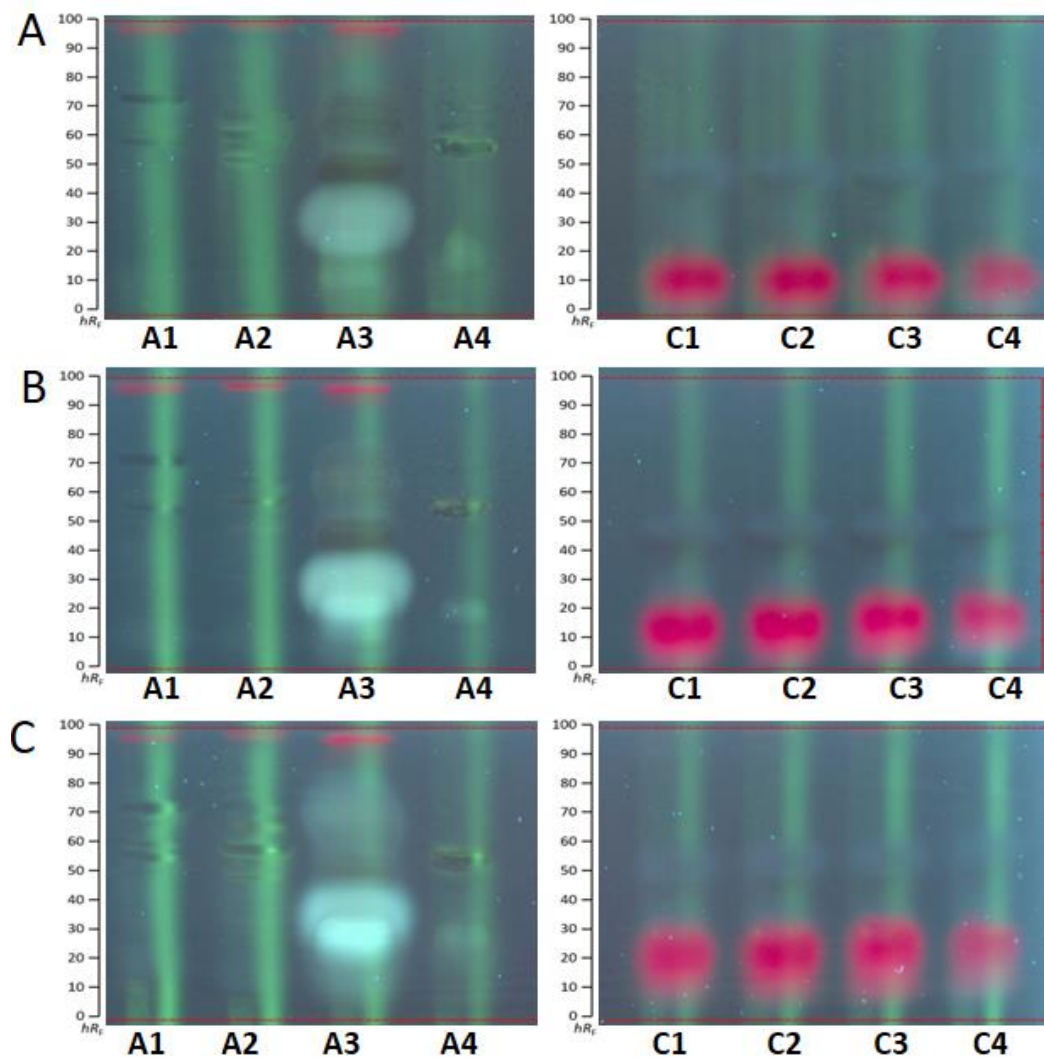

**Figure S2.** HPTLC-pYAVAS bioautograms at FLD 254 nm of *Akebia quinata* (A1–A4) and *Clitoria ternatea* (C1–C4) extracts (12 mm band, 10  $\mu$ L/band, 1 mg/band each) on HPTLC plate neutralized with (A) sodium bicarbonate buffer (pH 7), (B) sodium acetate buffer (pH 7) and (C) citrate buffer (pH 12) separated with ethyl acetate–methanol–water–acetic acid 70:15:15:1, V/V/V/V.
